# Supplementary material for: Ischemia-Like Stress Conditions Stimulate Trophic Activities of Adipose-Derived Stromal/Stem Cells
Source: MDPI journal article supplement (doi:10.3390/cells9091935), 2020-08-21
Supplement: s1 [file s1]

# Ischemia-Like Stress Conditions Stimulate Trophic Activities of Adipose-Derived Stromal/Stem Cells

Julia Bachmann <sup>1</sup>, Elias Ehlert <sup>1</sup>, Matthias Becker <sup>2</sup>, Christoph Otto <sup>3</sup>, Katrin Radeloff <sup>4</sup>,  
Torsten Blunk <sup>1</sup> and Petra Bauer-Kreisel <sup>1,\*</sup>

---

## Supplementary Methods

### *Cells and Cell Culture*

MCF-7 and MDA-MB-231 breast cancer cells (ATCC) were cultured in Dulbecco's Modified Eagle's Medium/Ham's F-12 (DMEM/F-12) (Thermo Scientific), supplemented with 1% penicillin/streptomycin (Thermo Scientific), and 10% fetal bovine serum (FBS; Thermo Scientific). When the cells reached 80%-85% confluence, they were detached with 0.25% trypsin-EDTA solution (Thermo Scientific) and passaged.

### *WST-8 Assay*

ASCs were seeded in growth medium in 96-well plates and after attachment of cells, they were cultured according to the respective condition. At the indicated time points, 10 µl Cell Counting Kit-8 (Sigma-Aldrich) containing the water-soluble tetrazolium salt WST-8 (2-(2-methoxy-4-nitrophenyl)-3-(4-nitrophenyl)-5-(2,4-disulfophenyl)-2H-tetrazolium, monosodium salt) was directly added into 100 µl culture medium. Cells were then incubated at 37°C for 4 hours. The respective light absorbance of the samples was recorded using a microplate reader (Infinite M200; Tecan, Crailsheim, Germany) at a wavelength of 450nm. The mean value of day 0 samples was taken as reference and set as 100%.

### *Proliferation and Metabolic Activity of Breast Cancer Cell Lines*

Conditioned medium from glucose/oxygen-deprived ASCs (ASC-CM<sub>ischemic</sub>) was prepared as described. Breast cancer cells (MCF-7 and MDA-MB-231) were treated with basal medium (DMEM, w/o FBS) and ASC-CM<sub>ischemic</sub>, each supplemented with 1 g/l glucose, under normoxic conditions. Proliferation and metabolic activity of the cells were analyzed at the indicated time points using a DNA and MTT assay as described.

## Supplementary Figures

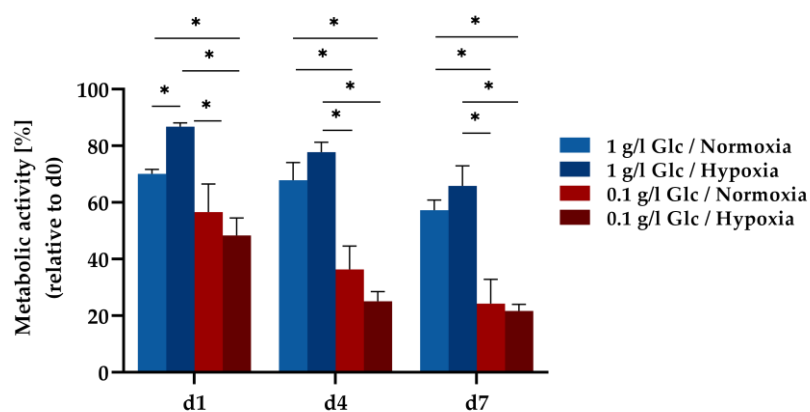

**Figure S1.** Metabolic activity of human ASCs under glucose and oxygen deprivation, determined by the WST-8 assay. The optical density was measured at 450 nm; % metabolic activity was calculated in relation to the mean value of day 0. Data are presented as means  $\pm$  SD of  $n = 3$ ; \*  $p < .05$ . Abbreviation: WST-8, 2-(2-methoxy-4-nitrophenyl)-3- (4-nitrophenyl)-5-(2,4-disulfophenyl)-2H-tetrazolium, monosodium salt.

A

|   | A                      | B                       | C                      | D                 | E               | F                       | G                 | H                      | I                      | J                    | K                    |
|---|------------------------|-------------------------|------------------------|-------------------|-----------------|-------------------------|-------------------|------------------------|------------------------|----------------------|----------------------|
| 1 | POS                    | POS                     | POS                    | POS               | NEG             | NEG                     | EHA-78<br>(CXCL5) | G-CSF                  | GM-CSF                 | GRO<br>a/b/g         | GRO alpha<br>(CXCL1) |
| 2 | I-309<br>(CCL1)        | IL-1 alpha<br>(IL-1 F1) | IL-1 beta<br>(IL-1 F2) | IL-2              | IL-3            | IL-4                    | IL-5              | IL-6                   | IL-7                   | IL-8<br>(CXCL8)      | IL-10                |
| 3 | IL-12<br>p40/p70       | IL-13                   | IL-15                  | IFN-gamma         | MCP-1<br>(CCL2) | MCP-2<br>(CCL8)         | MCP-3<br>(CCL7)   | M-CSF                  | MDC<br>(CCL22)         | MIG<br>(CXCL9)       | MIP-1 beta<br>(CCL4) |
| 4 | MIP-1 delta<br>(CCL15) | RANTES<br>(CCL5)        | SCF                    | SDF-1 alpha       | TARC<br>(CCL17) | TGF beta 1              | TNF alpha         | TNF beta<br>(TNFSF1B)  | EGF                    | IGF-1                | Angiogenin           |
| 5 | OSM                    | TPO                     | VEGF-A                 | PDGF-BB           | Leptin          | BDNF                    | BLC<br>(CXCL13)   | Ck beta 8-1<br>(CCL23) | Eotaxin-1<br>(CCL11)   | Eotaxin-2<br>(CCL24) | Eotaxin-3<br>(CCL26) |
| 6 | FGF-4                  | FGF-6                   | FGF-7<br>(KGF)         | FGF-9             | FLT-3 Ligand    | Fractalkine<br>(CX3CL1) | GCP-2<br>(CXCL6)  | GM-CSF                 | HGF                    | IGFBP-1              | IGFBP-2              |
| 7 | IGFBP-3                | IGFBP-4                 | IL-16                  | IP-10<br>(CXCL10) | LIF             | LIGHT<br>(TNFSF14)      | MCP-4<br>(CCL13)  | MIF                    | MIP-3 alpha<br>(CCL20) | HAP-2<br>(CXCL7)     | NT-3                 |
| 8 | NT-4                   | OPN<br>(SPP1)           | OPG<br>(TNFRSF11B)     | PARC              | PLGF            | TGF beta 2              | TGF beta 3        | TIMP-1                 | TIMP-2                 | POS                  | POS                  |

B

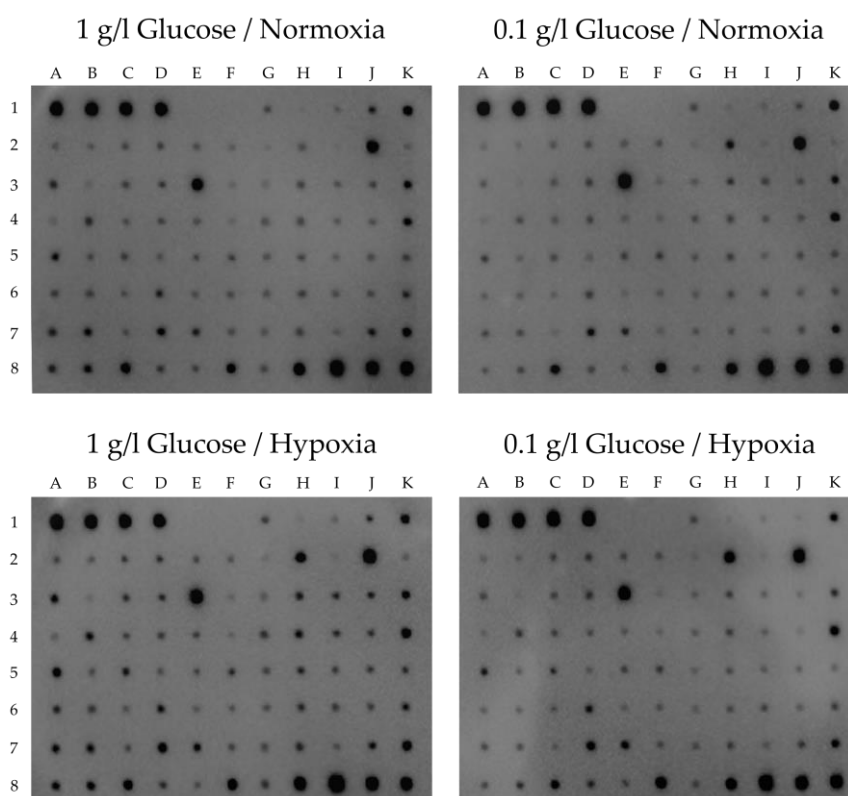

**Figure S2.** Human cytokine antibody array. (A) The map of the array (RayBio® human cytokine array C5, RayBiotech, Norcross, GA) showing the position of 80 human cytokines and positive and negative controls (as available on <https://doc.raybiotech.com/pdf/Manual/AAH-CYT-5.pdf>). (B) Array membranes were probed with supernatants of ASCs collected under 1 g/l glucose and normoxia (21% O<sub>2</sub>) (control), 1 g/l glucose and hypoxia (0.2% O<sub>2</sub>), 0.1 g/l glucose and normoxia (21% O<sub>2</sub>), and 0.1 g/l glucose and hypoxia (0.2% O<sub>2</sub>) at day 4 (n=2).

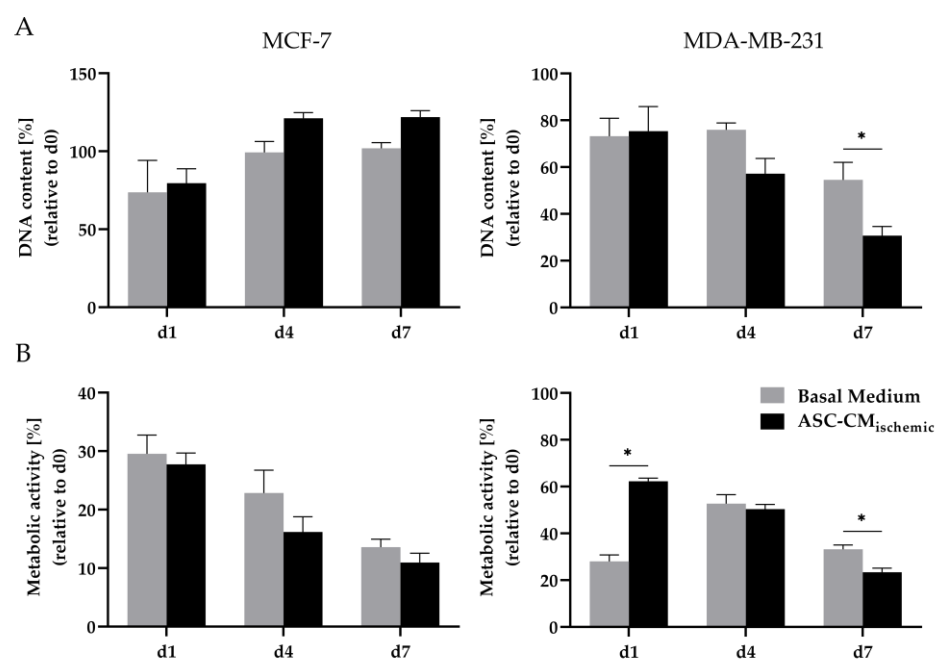

**Figure S3.** Effect of conditioned medium of glucose/oxygen-deprived ASCs (CM<sub>ischemic</sub>) on MCF-7 and MDA-MB-231 cancer cells growth rate and metabolic activity. (A) Quantitative determination of total DNA content in relation to the mean value of day 0. (B) Metabolic activity as determined by a MTT assay. MTT accumulated in MCF-7 and MDA-MB-231 was solubilized and the optical density was measured at 570 nm; % metabolic activity was calculated in relation to the mean value of day 0. Data are presented as means  $\pm$  SD of  $n = 3$ ; \*  $p < .05$ . Abbreviation: MTT, 3-(4,5-dimethylthiazol-2-yl)-2,5-diphenyltetrazolium bromide; ASC-CM<sub>ischemic</sub>, adipose-derived stem cell-conditioned medium of glucose/oxygen-deprived ASCs.
